# Supplementary material for: Unveiling the cytotoxic and anti-proliferative potential of green-synthesized silver nanoparticles mediated byColletotrichum gloeosporioides
Source: Royal Society of Chemistry journal article supplement (doi:10.1039/d3ra06145k), 2024-01-01
Supplement: d3ra06145k1.pdf [file d3ra06145k1.pdf]

## Supplementary information

### Title

Unveiling the Cytotoxic and Anti-Proliferative Potential of Green-Synthesized Silver Nanoparticles Mediated by *Colletotrichum gloeosporioides*

### Authors

Priyamvada Gupta<sup>1#</sup>, Swati Singh<sup>1#</sup>, Nilesh Rai<sup>1</sup>, Ashish Verma<sup>1</sup>, Harshita Tiwari<sup>1</sup>, Swapnil C. Kamble<sup>2</sup>, Hemant Kumar Gautam<sup>3</sup>, Vibhav Gautam\*<sup>1</sup>

*#Equal Contribution*

### Affiliations

<sup>1</sup>*Centre of Experimental Medicine and Surgery, Institute of Medical Sciences, Banaras Hindu University, Varanasi-221005, India*

<sup>2</sup>*Department of Technology, Savitribai Phule Pune University, Ganeshkhind, Pune 411007, India*

<sup>3</sup>*Department of Immunology and Infectious Disease Biology, CSIR-Institute of Genomics and Integrative Biology, Sukhdev Vihar, New Delhi 110025, India*

### \*Corresponding author

Dr. Vibhav Gautam

### Address

Centre of Experimental Medicine and Surgery,  
Institute of Medical Sciences  
Banaras Hindu University  
Varanasi 221005, India  
Telephone: +918860182113  
Email: vibhav.gautam4@bhu.ac.in

**Table S1.** List of forward and reverse primers, and their sequences used in qRT-PCR analysis

| <b>Genes</b> | <b>Forward primers (FP) and Reverse primers (RP)</b>     |
|--------------|----------------------------------------------------------|
| <i>BAX</i>   | FP- CCAAGAAGCTGAGCGAGTGT<br>RP- CCGGAGGAAGTCCAATGTC      |
| <i>P21</i>   | FP- ATGAGTTGGGAGGAGGCAG<br>RP- GGC GTTTGGAGTGGTAGAA      |
| <i>P53</i>   | FP- CCATCTACAAGCAGTCACAG<br>RP- TCATCCAATACTCCACACG      |
| <i>FADD</i>  | FP-CCCACCAAGATCCCAGTGAT<br>RP-CCAGGAACTTGGTCTTGTCCA      |
| <i>BCL-2</i> | FP- GGGTATGAAGGACCTGTATTGG<br>RP- CATGCTGATGTCTCTGGAATCT |

**Table S2.** FTIR analysis of CgAgNPs

| <b>Wavenumber (cm<sup>-1</sup>)</b> | <b>Functional Group</b>                                     | <b>Types of Vibration</b> |
|-------------------------------------|-------------------------------------------------------------|---------------------------|
| 3276.38                             | Hydroxyl group                                              | OH stretch                |
| 1726.16                             | Aldehyde                                                    | C-H stretch               |
| 1634.68                             | Primary amine                                               | NH stretch                |
| 1544.13                             | Aliphatic nitro compounds<br>or Aromatic nitro<br>compounds | NO <sub>2</sub> stretch   |
| 1380.60                             | Methyl group                                                | C-H stretch               |
| 1229.57                             | Aromatic phosphates                                         | P-O-C stretch             |
| 1057.79                             | Alkyl-substituted ether                                     | C-O stretch               |
| 467.05                              | Aryl disulphides                                            | S-S stretch               |

## Figure legends

**Figure S1.** Calibration curve of pyruvic acid for LDH assay.

**Figure S2.** FTIR spectrum of the aqueous extract of *C. gloeosporioides*.

**Figure S3.** Two dimensional (2D) AFM image showing the surface topography and dispersity of CgAgNPs.

**Figure S4:** Effect of CgAgNPs on viability of RAW 264.7 cells determined through MTT assay. The data is representative of three independent experiments. The statistical significance was determined through calculation of p-value where means  $\pm$  SEM of percentage cell viability of the human breast cancer cells were compared using one-way ANOVA followed by Tukey. The statistical significance is represented as: \*\*\* $p \leq 0.001$ ; \*\* $p \leq 0.002$ ; and \* $p \leq 0.033$ .

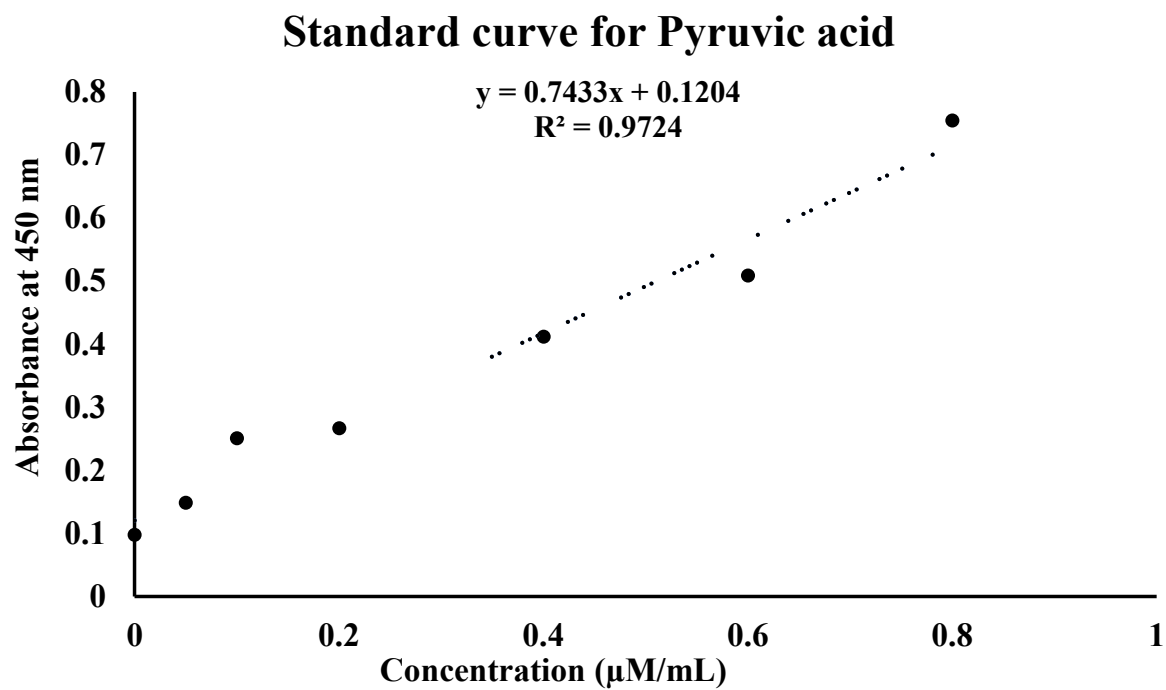

**Figure S1.** Calibration curve of pyruvic acid for LDH assay.

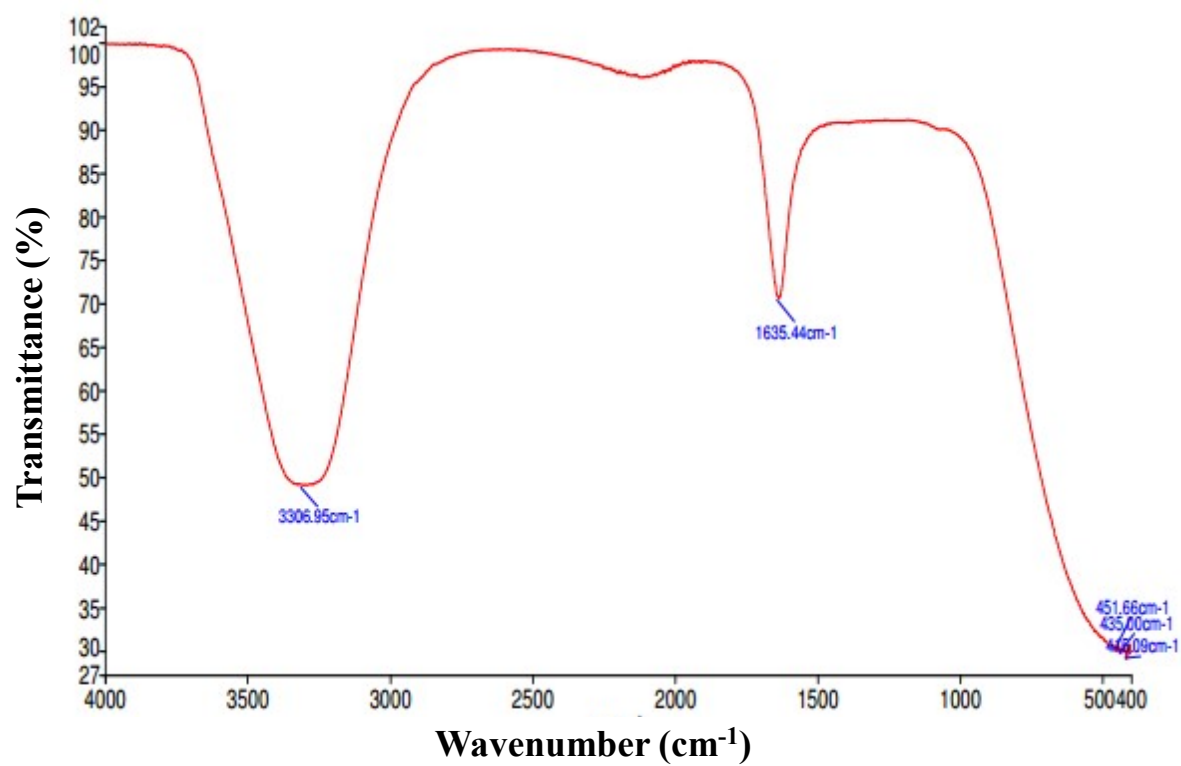

**Figure S2.** FTIR spectrum of the aqueous extract of *C. gloeosporioides*.

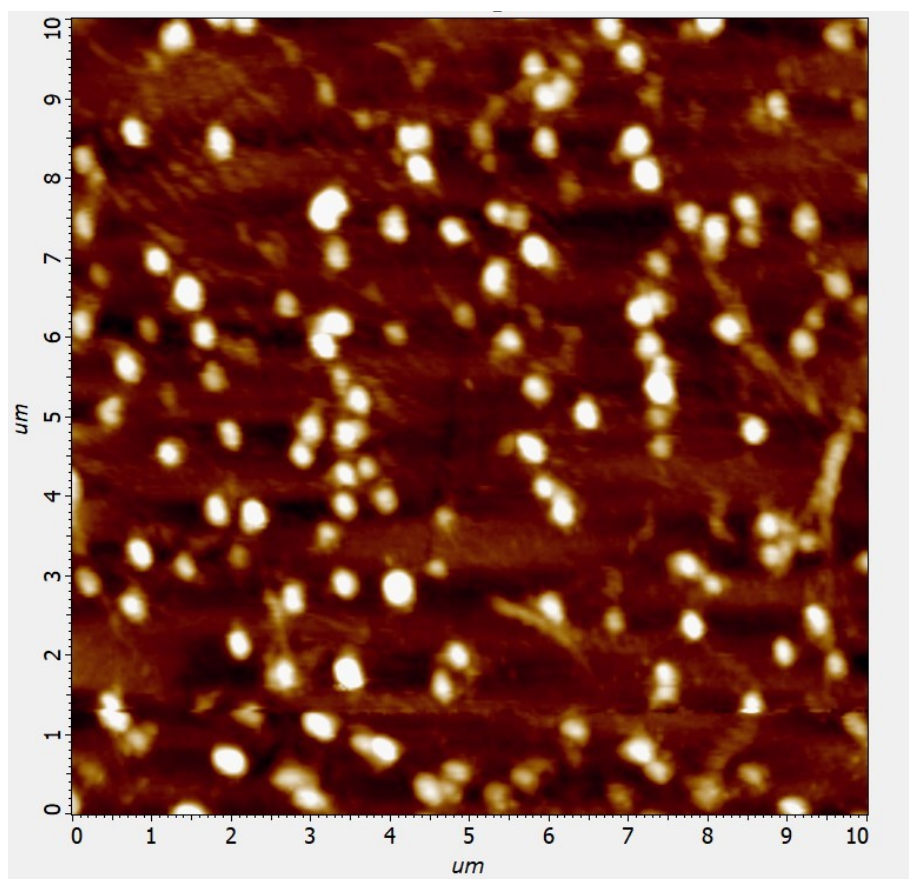

**Figure S3.** Two dimensional (2D) AFM image showing the surface topography and dispersity of CgAgNPs.

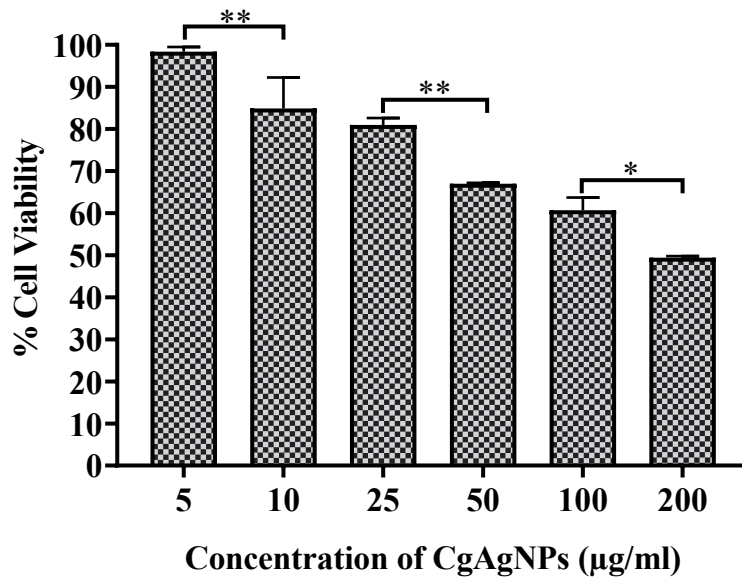

**Figure S4.** Effect of CgAgNPs on viability of RAW 264.7 cells determined through MTT assay. The data is representative of three independent experiments. The statistical significance was determined through calculation of p-value where means  $\pm$  SEM of percentage cell viability of the human breast cancer cells were compared using one-way ANOVA followed by Tukey. The statistical significance is represented as: \*\*\* $p \leq 0.001$ ; \*\* $p \leq 0.002$ ; and \* $p \leq 0.033$ .
